# Supplementary material
Source: ML conference proceedings conference paper supplement (https://openaccess.thecvf.com/content/CVPR2023/html/Chen_Implicit_Neural_Head_CVPR_2023_paper.html)
Supplement: Supplementary file 1 [file Chen_Implicit_Neural_Head_CVPR_2023_supplemental.zip › CVPR2023-ImplicitNeuralHeadSynthesisViaControllableLocalDeformationFields-SupplementaryDocument.pdf]

# Implicit Neural Head Synthesis via Controllable Local Deformation Fields

## - Supplementary Material -

Chuhan Chen<sup>1\*</sup>

Matthew O’Toole<sup>1</sup>

Gaurav Bharaj<sup>2</sup>

Pablo Garrido<sup>2</sup>

<sup>1</sup>Carnegie Mellon University <sup>2</sup>Flawless AI

### 1. Implementation Details

**TensoRF** We use TensorRF [2] for the canonical space of our pipeline with the following architecture changes, we use 1) an appearance latent code into the MLP decoder to account for appearance inconsistencies, and 2) RELU activation to threshold volume densities instead of Softplus to allow sharper reconstruction. To combine the training of TensoRF and deformation fields, we freeze the deformation field and pre-train TensoRF for 14k iterations. During pre-training, we grow the voxel grid from  $128^3$  to the maximum resolution  $300^3$  (as in the original paper) for *Subject1*, *Subject2*, and *Subject4* and  $200^3$  for *Subject3*. We also prune voxels with density smaller than  $1e^{-4}$ .

**Deformation Field** The architecture of the deformation field is shown in Fig. 7. Each local deformation field consists of a 3-layer MLP. Each layer consists of 40 neurons, followed by a Leaky RELU. The input to the input layer of each local field MLP is concatenation of a global expression code and jaw pose masked with the Attention Mask, global deformation latent code, and head and neck pose.

**RigNeRF\*** We modify the original RigNerf [1] architecture for the monocular setting and refer to it as RigNeRF\*, where the head pose from the tracker is transformed into a camera extrinsic matrix, as if the head remains static and the camera moves. Hence, for each frame, we query the mesh deformed by expression only, instead of both pose, and expression as in the original paper. We use the same network architecture, and parameters for the deformation field, as well as the same latent code dimensions. Finally, we train each sequence for 1M iterations with ray batch-size of 1550 instead of the 100k epochs indicated in the original paper, as it is a less complex task for the deformation field to learn the deformation due to expressions only rather than both pose and expression.

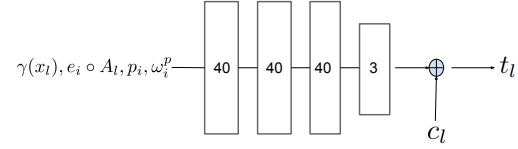

Figure 7. Architecture diagram of a single local field  $D_l$ .

|                 |      | Neck  |        |        | Head  |       |        | Jaw  |         |        |
|-----------------|------|-------|--------|--------|-------|-------|--------|------|---------|--------|
|                 |      | MEAN  | STD    |        | MEAN  | STD   |        | MEAN | STD     |        |
| <i>Subject1</i> | MEAN | 6.09  | 0.314  | -1.14  | 1.53  | -6.44 | -0.105 | 7.37 | -0.0643 | 0.258  |
|                 | STD  | 6.75  | 4.21   | 6.02   | 10.1  | 15.10 | 6.63   | 1.89 | 2.26    | 3.24   |
| <i>Subject2</i> | MEAN | 1.27  | -0.432 | 0.143  | 3.63  | -1.69 | -2.67  | 3.94 | -1.02   | -1.26  |
|                 | STD  | 7.64  | 7.42   | 6.77   | 9.66  | 32.3  | 7.60   | 2.44 | 3.16    | 6.51   |
| <i>Subject3</i> | MEAN | -2.75 | 0.236  | -0.794 | -1.35 | 4.02  | 2.55   | 6.60 | 0.781   | -0.981 |
|                 | STD  | 2.41  | 1.20   | 3.21   | 3.84  | 4.76  | 3.66   | 1.93 | 0.936   | 2.34   |
| <i>Subject4</i> | MEAN | 3.11  | -1.83  | -2.87  | -5.53 | -2.07 | 2.65   | 4.54 | -0.491  | 0.714  |
|                 | STD  | 4.70  | 5.99   | 2.98   | 6.33  | 16.8  | 4.19   | 2.56 | 2.18    | 4.68   |

Table 3. Pose distribution of 4 sequences in the order of yaw, pitch, roll in degrees.

### 2. Dataset Analysis

Our video dataset consists of four subjects, as shown in Fig. 4 (main paper). *Subject1* (1st column) and *Subject2* (4th column) are subjects captured indoors with a 4K phone camera. *Subject3* (3rd column) is ex-president Obama addressing a commencement speech, and is a segment of the HD video downloaded from YouTube.<sup>1</sup> *Subject4* (2nd column) is a female subject from IM Avatar benchmark dataset.<sup>2</sup> The first three datasets show unscripted natural expressions with varying head poses, while the latter is split into a speech video and another video with difficult expressions and poses, as described in [5]. Tab. 3 shows the neck, head, and jaw pose distribution of the four monocular sequences. Please refer to the supplementary video for detailed visualization of the poses as well as the range of expressions.

### 3. Additional Results

Test-time latent code optimization (deformation and appearance) helps adjust pose inaccuracies, which is a cur-

<sup>1</sup>Commencement speech of class 2020: <https://youtu.be/NGEvASSaPyg>

<sup>2</sup>[https://dataset.ait.ethz.ch/downloads/IMavatar\\_data/data/yufeng.zip](https://dataset.ait.ethz.ch/downloads/IMavatar_data/data/yufeng.zip) We use sequence MVL1810 and MVL1814 as training set and MVL1812 as test set

\*Work was done while interning at Flawless AI.

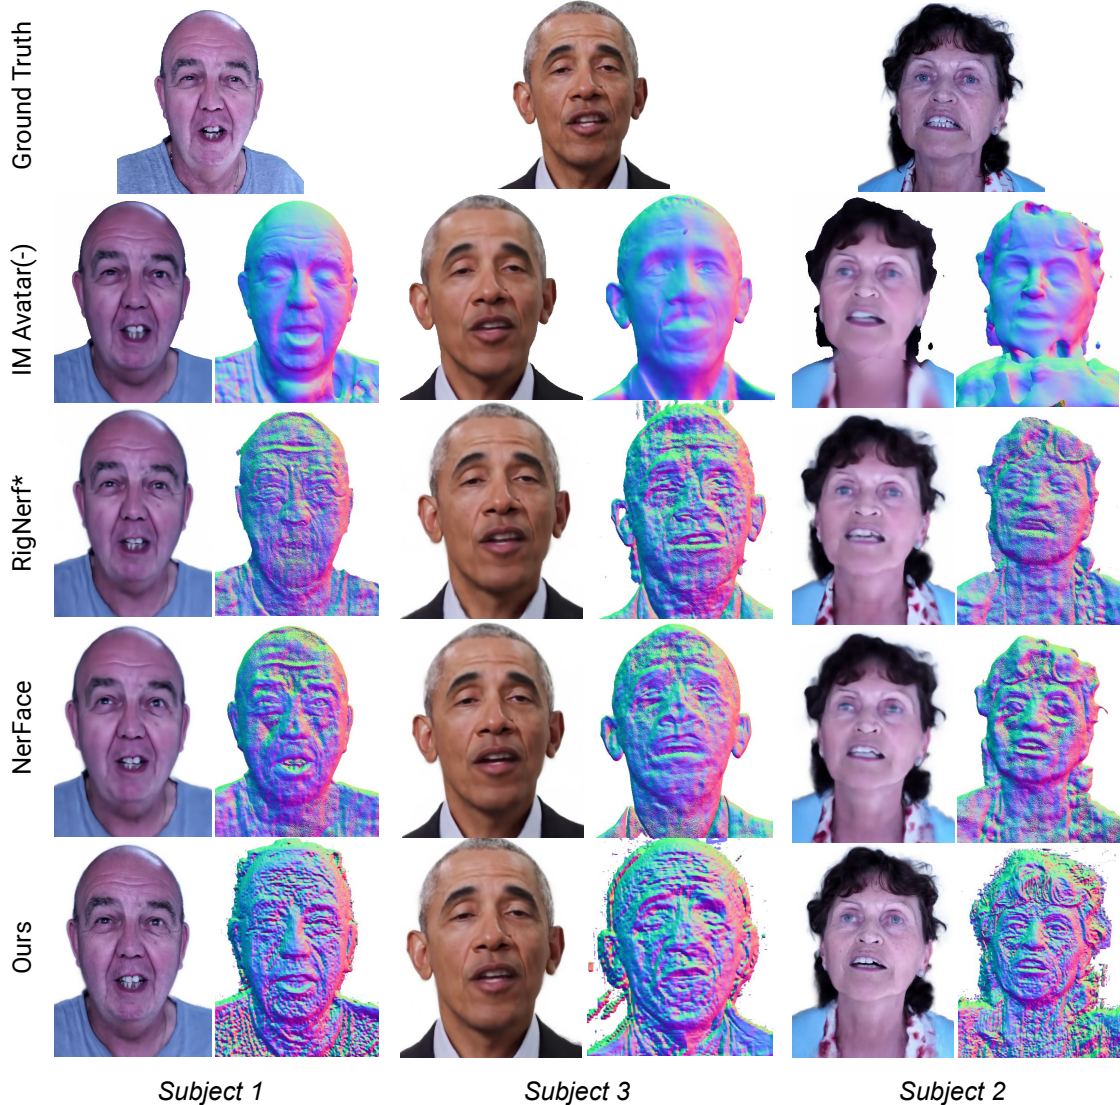

Figure 8. **Qualitative comparisons of geometry with state-of-the-art on test data without tuning of latent code during test time.** Top to bottom: GT, IM Avatar(-), RigNerf\*, NerFace, and our approach. Here, the images are rendered with the latent codes of the first training frame of each sequence. Note that our approach produces significantly richer geometric details, as observed in the normal maps. Besides, the rendered images generated by our method faithfully reflect the pose, expression, and appearance of the ground truth images.

rent limitation of our approach. However, our model excels at producing high-quality reconstruction, even without per-frame latent code optimization. Fig. 8 compares the quality of the normals obtained by our methods and the different baselines on *Subject1*, *Subject2*, and *Subject3*. Note that no image detail is lost when compared to Fig. 4 (main paper). Besides, our method produces crisper results than baseline approaches, as shown in the reconstructed normal maps.

Tab. 4 shows additional metrics for Ours<sup>†</sup> and RigNerf\*<sup>†</sup>, both using no optimized latent code. Ours<sup>†</sup> suffers from global pose misalignment (several pixels off)

without optimized latent code, impacting per-pixel image metrics (PSNR and  $\ell_1$ ). Local facial structures are still well preserved as demonstrated by consistently lower scores (second best) on LPIPS for which we still achieve state-of-the-art performance.

## 4. Extended Analysis

**Modeling Local Deformation Fields** In our implementation, we model local deformation fields around a subset of facial landmarks using DECA’s landmark definition [3]. Specifically, we experimented with 5 and 34 keypoint lo-

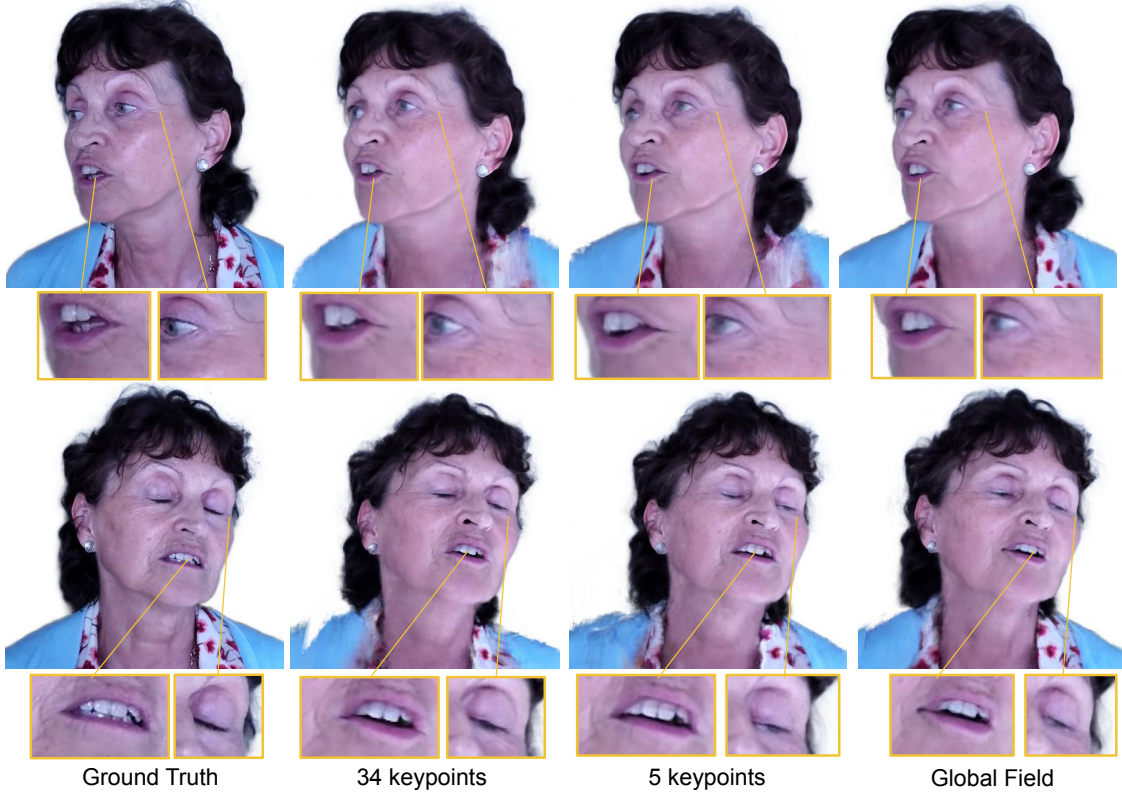

Figure 9. **Ablation on the number of keypoints used by our method.** From left to right: ground truth, 34 keypoints, 5 keypoints, and global field (*i.e.*, no local decomposition). Note that the network size for each experiment is adjusted such that the total number of parameters is roughly the same. Our method produces better visual results with 34 keypoints.

|              | Subject1            |                 |                    |                 | Subject2            |                 |                    |                 |
|--------------|---------------------|-----------------|--------------------|-----------------|---------------------|-----------------|--------------------|-----------------|
|              | $\ell_1 \downarrow$ | SSIM $\uparrow$ | LPIPS $\downarrow$ | PSNR $\uparrow$ | $\ell_1 \downarrow$ | SSIM $\uparrow$ | LPIPS $\downarrow$ | PSNR $\uparrow$ |
| Nerface      | 0.058               | 0.903           | 0.105              | 21.457          | 0.077               | <b>0.889</b>    | 0.121              | 18.252          |
| IM Avatar(-) | 0.068               | 0.901           | 0.113              | 20.502          | 0.093               | 0.877           | 0.157              | 14.960          |
| RigNeRF*     | <b>0.055</b>        | <b>0.904</b>    | 0.095              | <b>22.324</b>   | <b>0.072</b>        | 0.884           | 0.120              | <b>18.922</b>   |
| RigNeRF*†    | 0.0767              | 0.876           | 0.108              | 18.829          | 0.0814              | 0.881           | 0.131              | 17.598          |
| Ours†        | 0.0773              | 0.895           | <b>0.0611</b>      | 19.681          | 0.0873              | 0.876           | <b>0.0795</b>      | 16.917          |
| Ours         | <b>0.054</b>        | <b>0.929</b>    | <b>0.051</b>       | <b>23.508</b>   | <b>0.062</b>        | <b>0.917</b>    | <b>0.0576</b>      | <b>20.4375</b>  |
|              | Subject3            |                 |                    |                 | Subject4            |                 |                    |                 |
|              | $\ell_1 \downarrow$ | SSIM $\uparrow$ | LPIPS $\downarrow$ | PSNR $\uparrow$ | $\ell_1 \downarrow$ | SSIM $\uparrow$ | LPIPS $\downarrow$ | PSNR $\uparrow$ |
| Nerface      | 0.047               | 0.894           | 0.055              | 22.220          | 0.077               | 0.818           | 0.085              | 17.910          |
| IM Avatar(-) | 0.043               | 0.900           | 0.078              | 23.218          | <b>0.063</b>        | <b>0.870</b>    | 0.069              | <b>19.215</b>   |
| RigNeRF*     | 0.035               | 0.910           | 0.052              | <b>24.634</b>   | <b>0.065</b>        | <b>0.844</b>    | 0.063              | <b>19.253</b>   |
| RigNeRF*†    | 0.03430             | 0.898           | 0.0526             | 23.109          | 0.118               | 0.727           | 0.129              | 14.677          |
| Ours†        | <b>0.0335</b>       | <b>0.925</b>    | <b>0.0387</b>      | 24.552          | 0.0745              | 0.789           | <b>0.0453</b>      | 16.834          |
| Ours         | <b>0.0206</b>       | <b>0.971</b>    | <b>0.0265</b>      | <b>30.854</b>   | 0.081               | 0.830           | <b>0.062</b>       | 19.085          |

Table 4. Extended quantitative comparisons for Tab. 1. Ours† and RigNeRF\*† are run without optimized per-frame deformation latent code. **Bold black** is best result; **blue** is second best.

cations, as shown in Fig. 10. The former representation is similar to [4], though we change the tip of the nose with the midpoint of the lower lip to better model jaw deformations. In the latter, denser representation, we exploit the semantics of the facial landmark definition and center local fields around every other landmark.

Fig. 9 compares the effect of using different numbers of keypoints. Note that our method reconstructs sharper de-

tails and more accurate facial features when the deformation field is decomposed with 34 keypoints. Overall local decomposition with both 34 and 5 keypoints results in better reconstruction of details than that of the global field. The latter tends to over smooth the reconstructed surface and produce less accurate facial deformations than multiple local deformation fields.

## References

- [1] ShahRukh Athar, Zexiang Xu, Kalyan Sunkavalli, Eli Shechtman, and Zhixin Shu. Rignerf: Fully controllable neural 3d portraits. *CoRR*, abs/2206.06481, 2022. 1
- [2] Anpei Chen, Zexiang Xu, Andreas Geiger, Jingyi Yu, and Hao Su. Tensorf: Tensorial radiance fields. *CoRR*, abs/2203.09517, 2022. 1
- [3] Yao Feng, Haiwen Feng, Michael J. Black, and Timo Bolkart. Learning an animatable detailed 3d face model from in-the-wild images. *ACM TOG*, 40(4):88:1–88:13, 2021. 2
- [4] Mingwu Zheng, Hongyu Yang, Di Huang, and Liming Chen. Imface: A nonlinear 3d morphable face model with implicit neural representations. *CoRR*, abs/2203.14510, 2022. 3

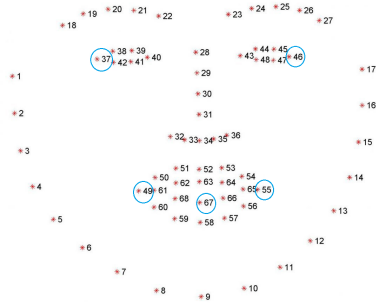

(a) locations of 5 keypoints

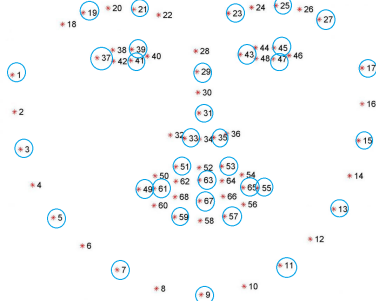

(b) locations of 34 keypoints

Figure 10. keypoint locations for experiments

- [5] Yufeng Zheng, Victoria Fernández Abrevaya, Xu Chen, Marcel C. Bühler, Michael J. Black, and Otmar Hilliges. I M avatar: Implicit morphable head avatars from videos. *CoRR*, abs/2112.07471, 2021. 1
